# Supplementary material
Source: PubMed Central journal article supplement (PMC4687804)

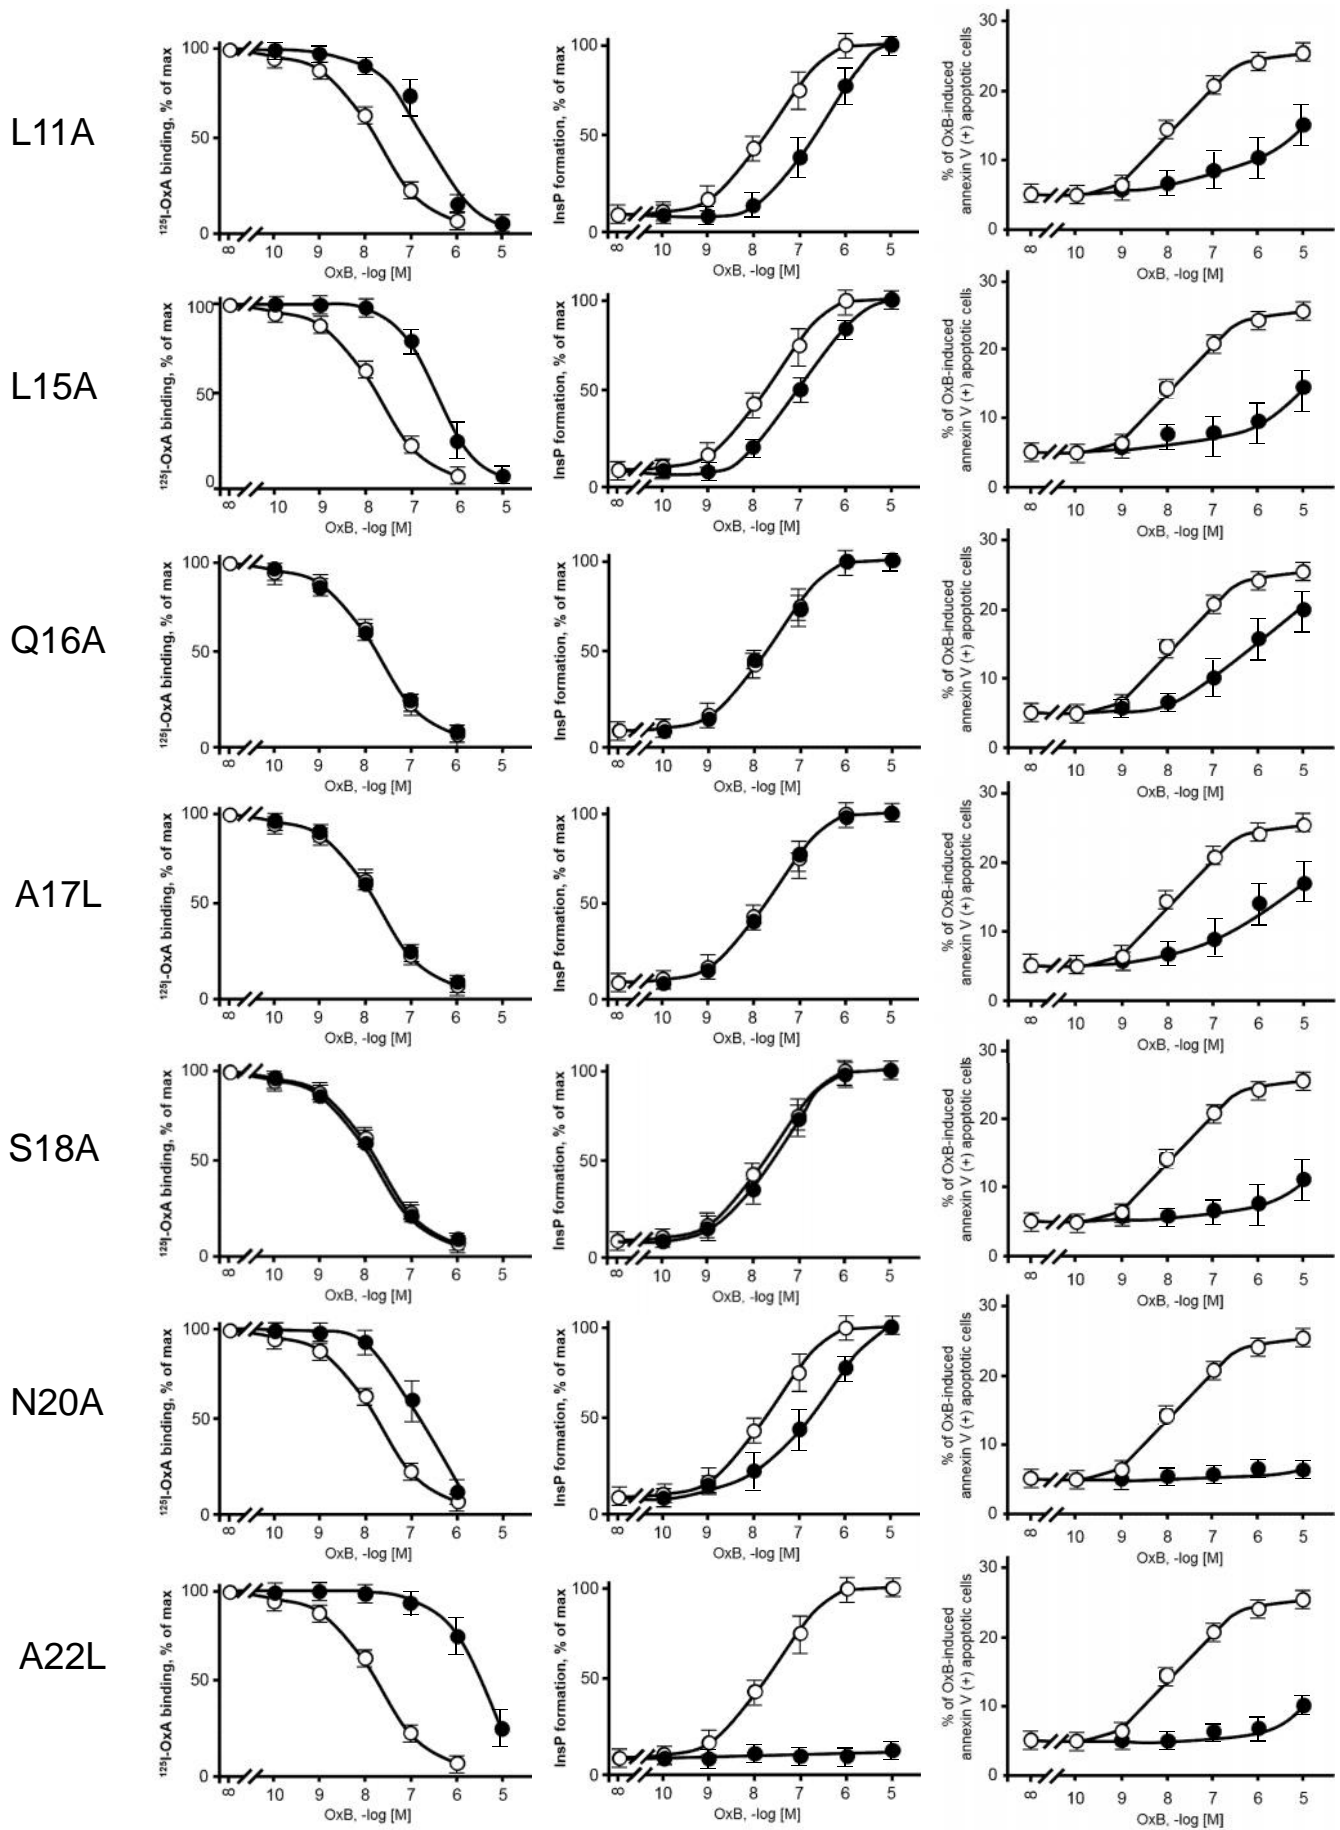

Figure S1A

Supplement: BPH-172-5211-s002.pdf [file BPH-172-5211-s002.pdf]

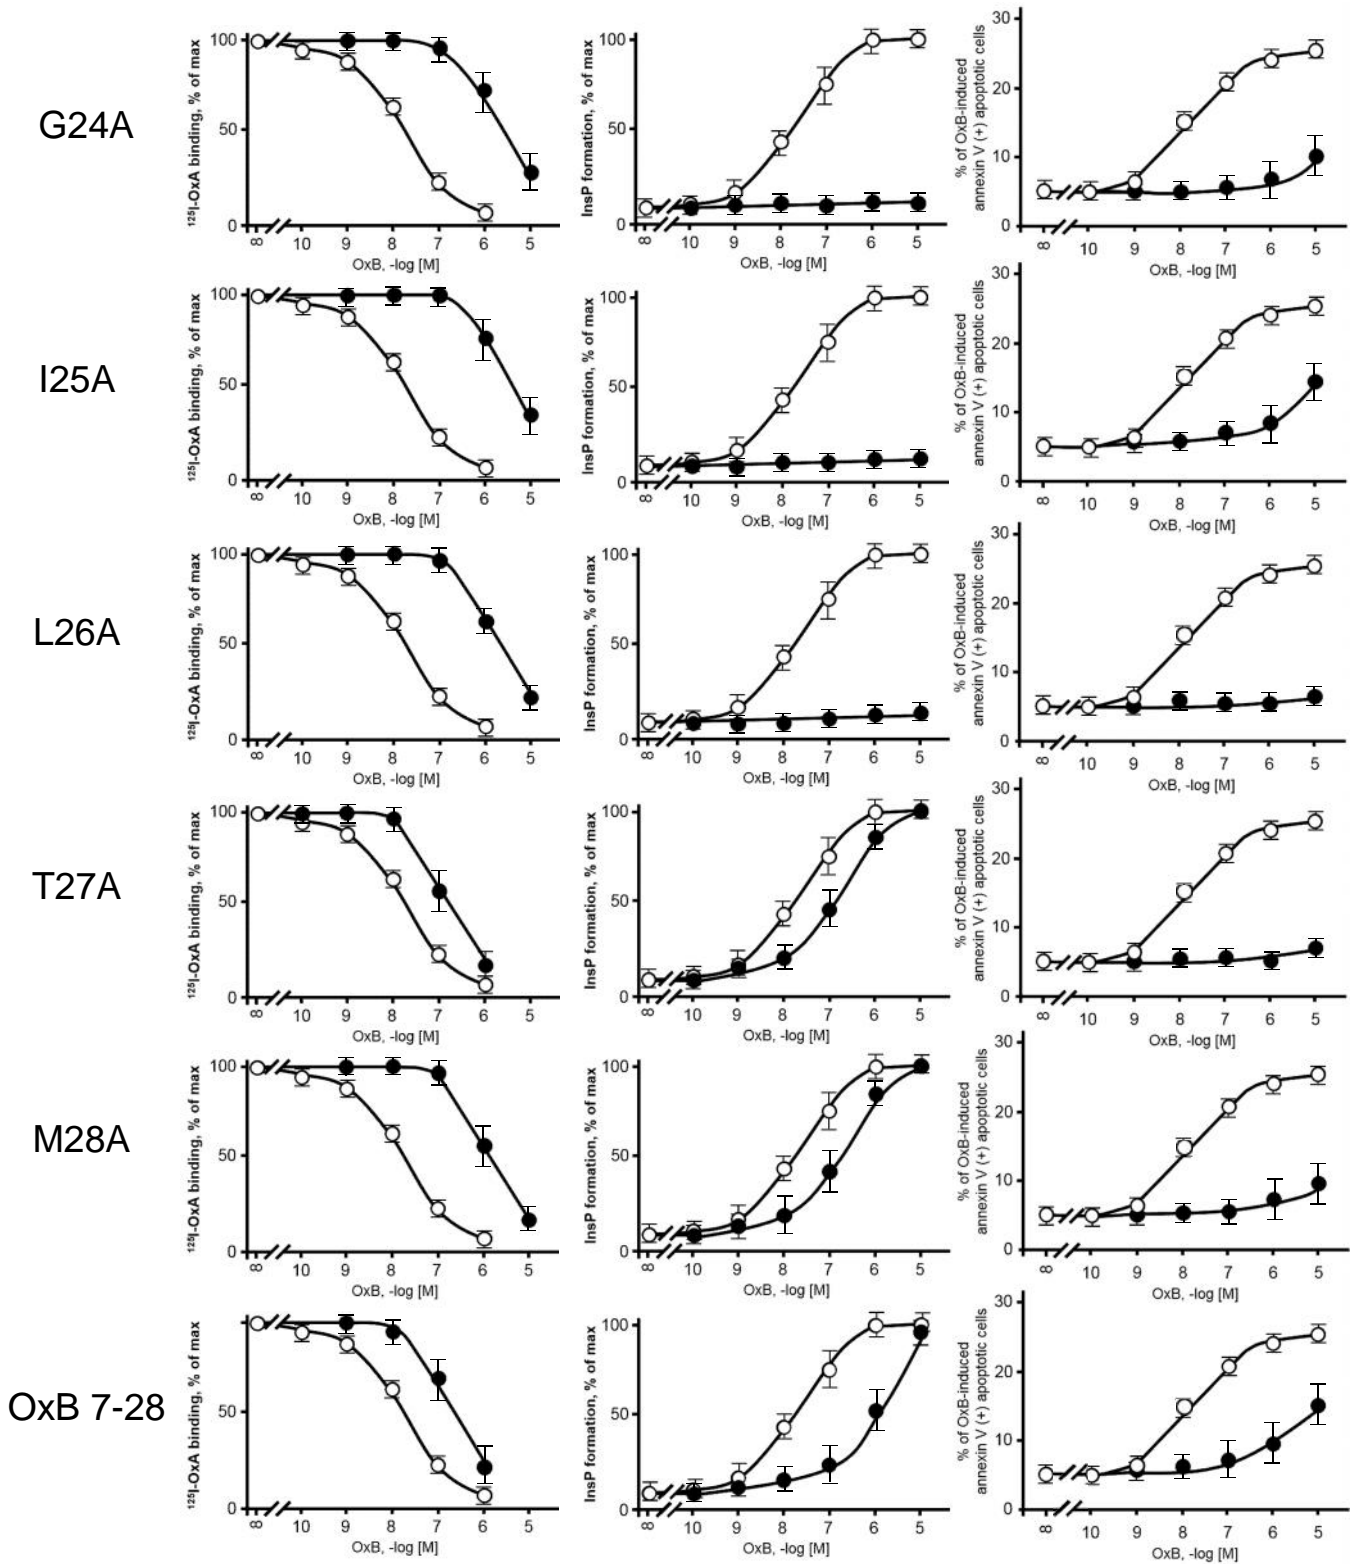

Figure S1B

Supplement: BPH-172-5211-s003.pdf [file BPH-172-5211-s003.pdf]

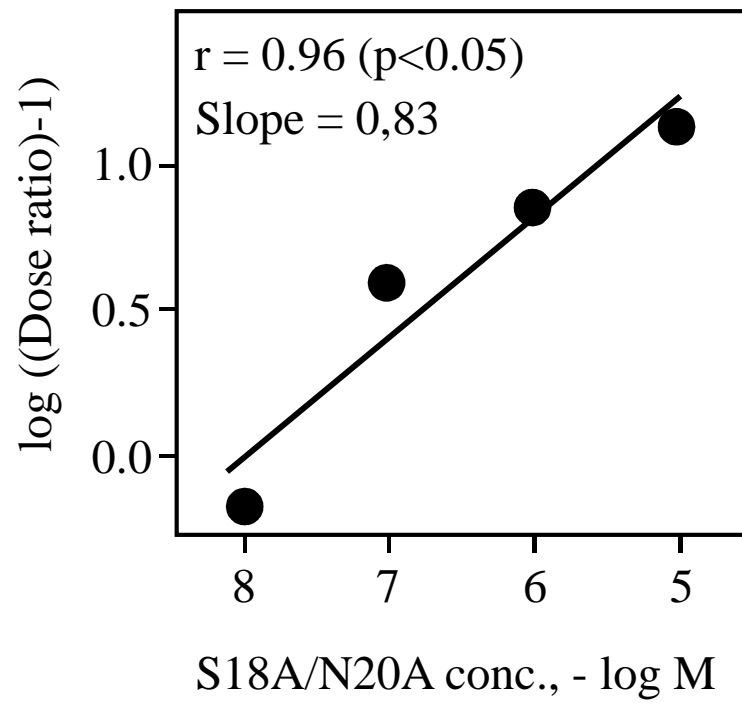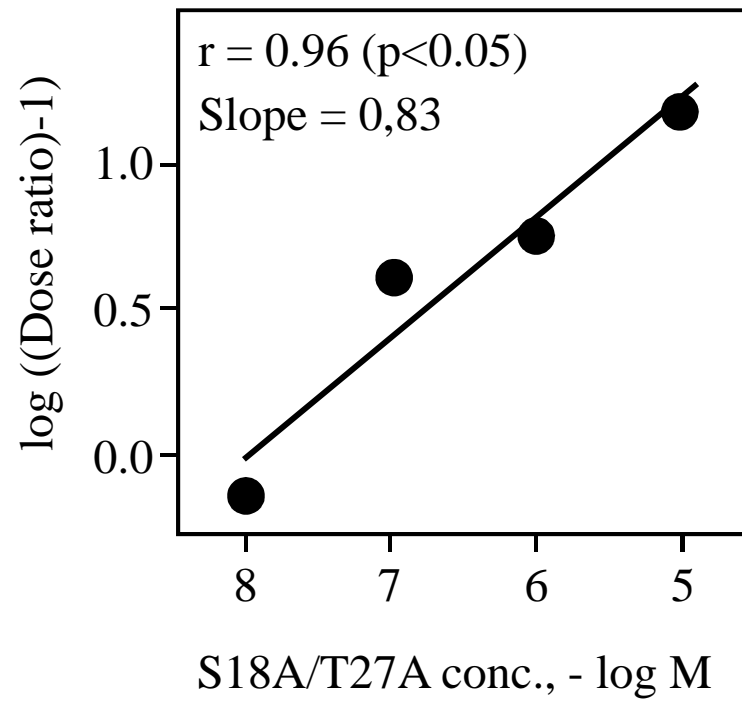

Figure S2

Supplement: BPH-172-5211-s004.pdf [file BPH-172-5211-s004.pdf]

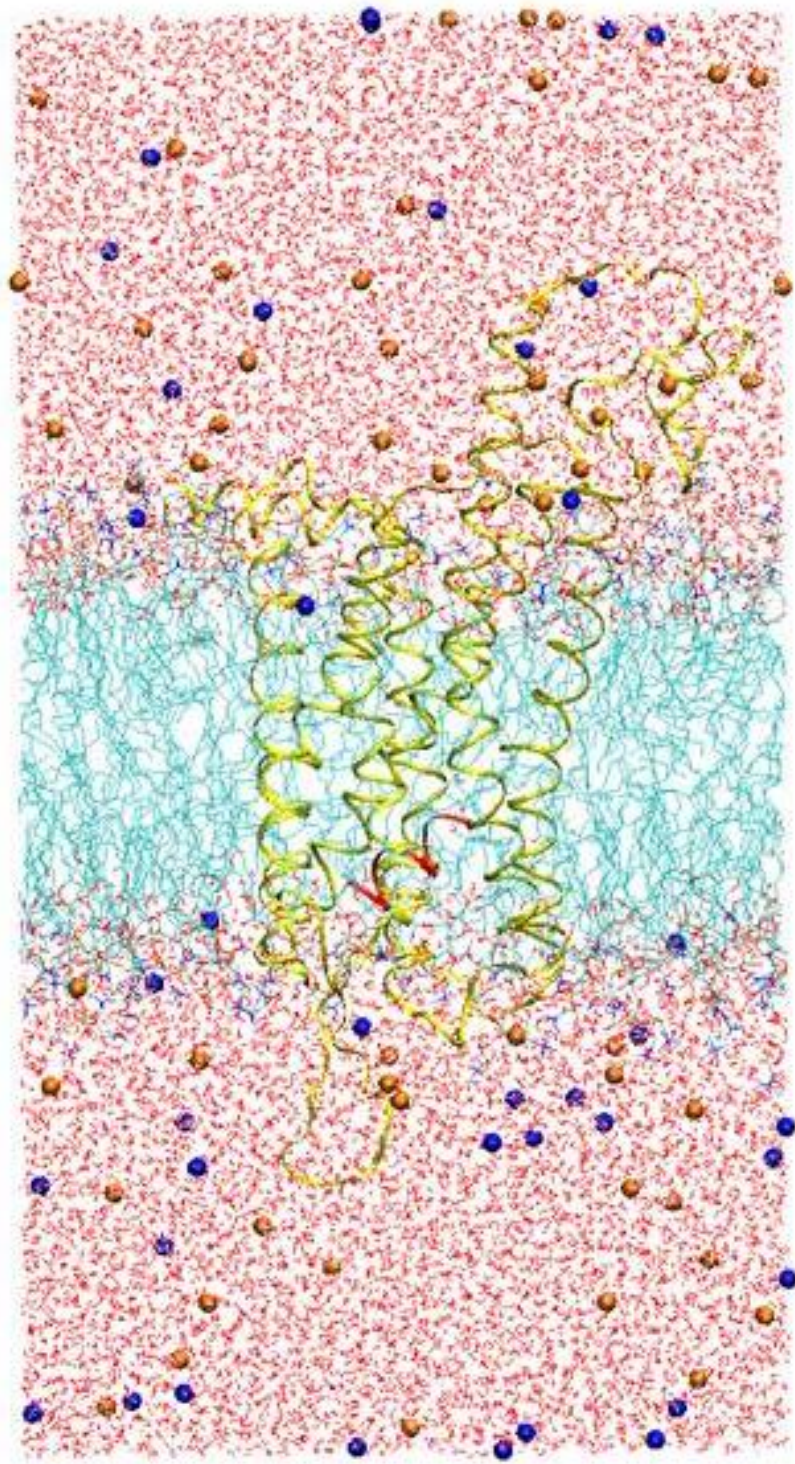

Figure S3

Supplement: BPH-172-5211-s005.pdf [file BPH-172-5211-s005.pdf]

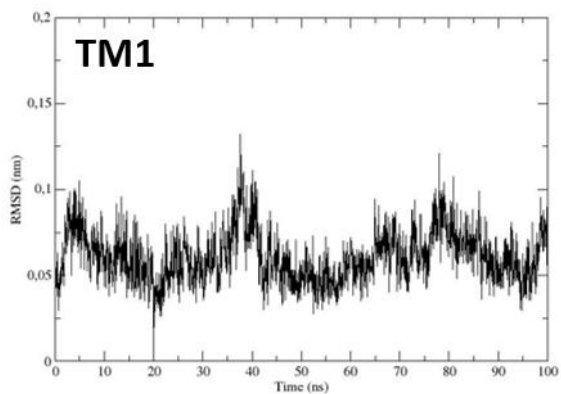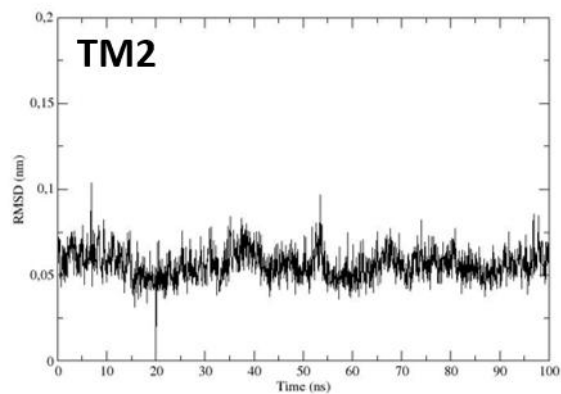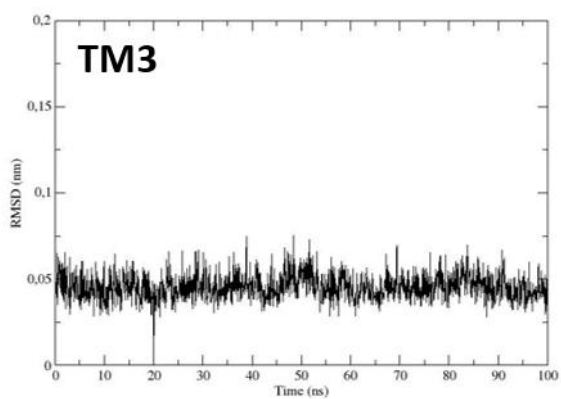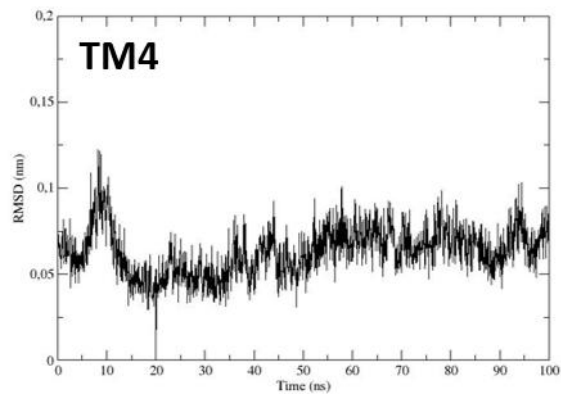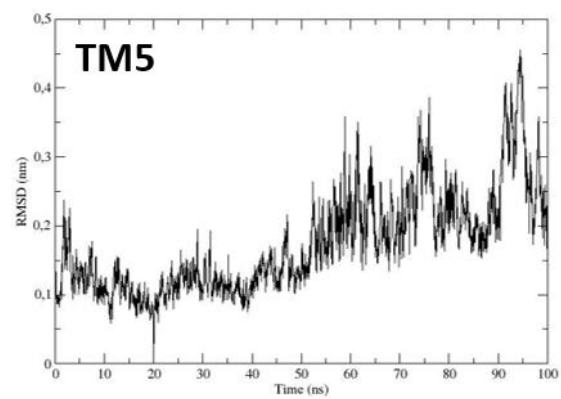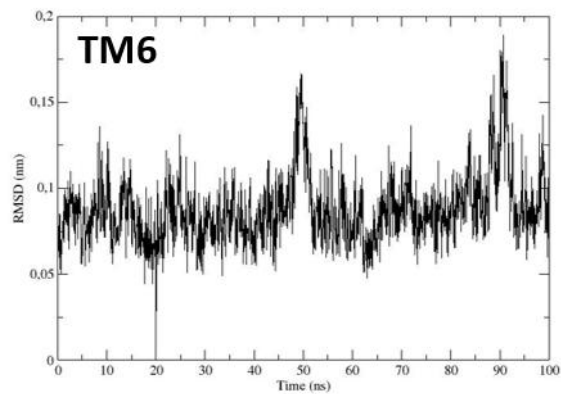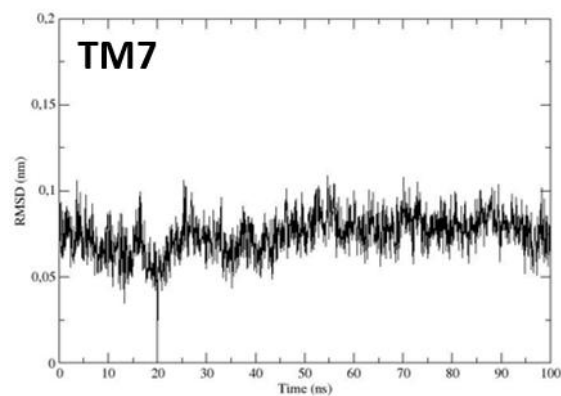

Figure S4

Supplement: BPH-172-5211-s006.pdf [file BPH-172-5211-s006.pdf]

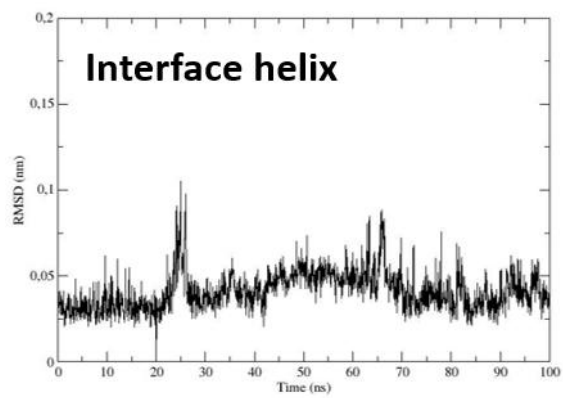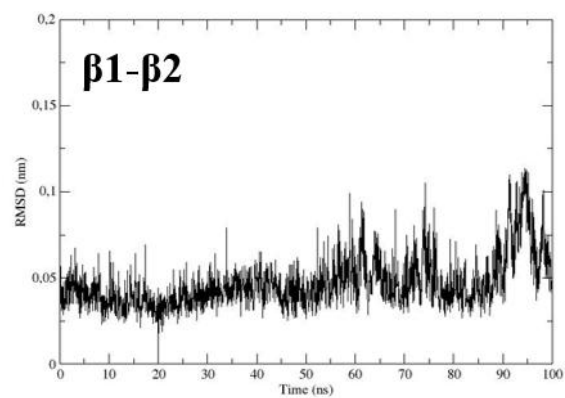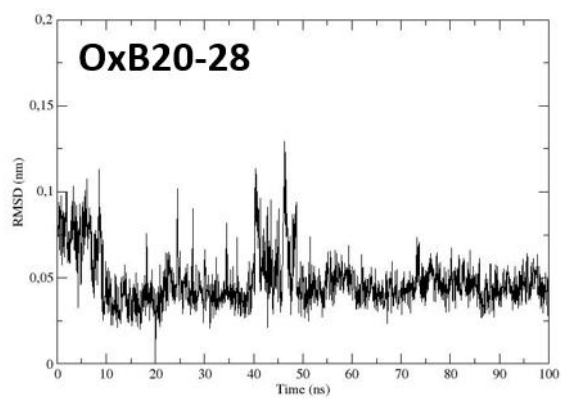

Figure S5

Supplement: BPH-172-5211-s007.pdf [file BPH-172-5211-s007.pdf]

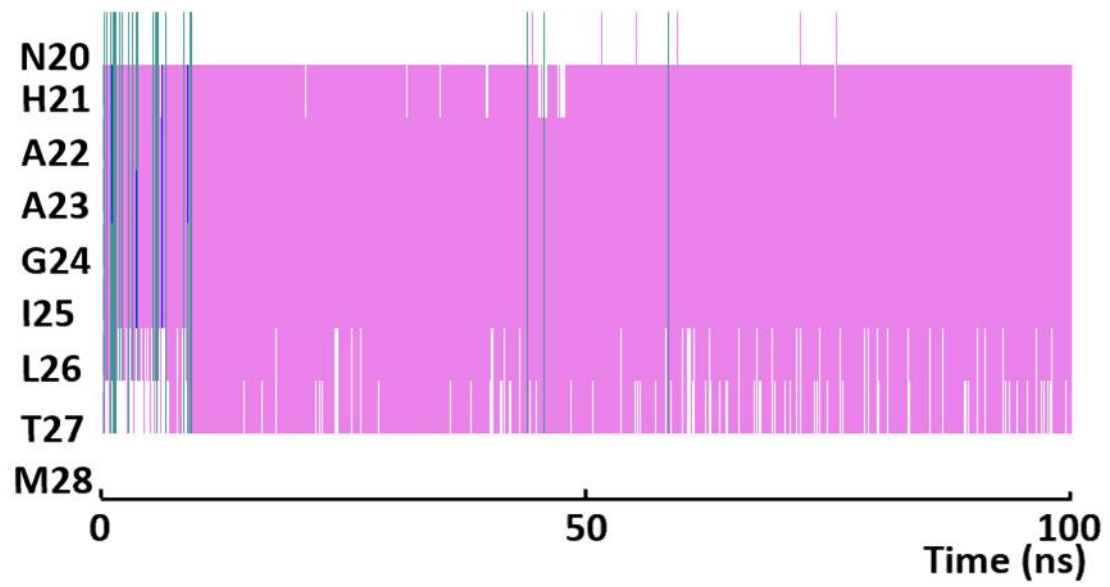

Figure S6

Supplement: BPH-172-5211-s008.pdf [file BPH-172-5211-s008.pdf]

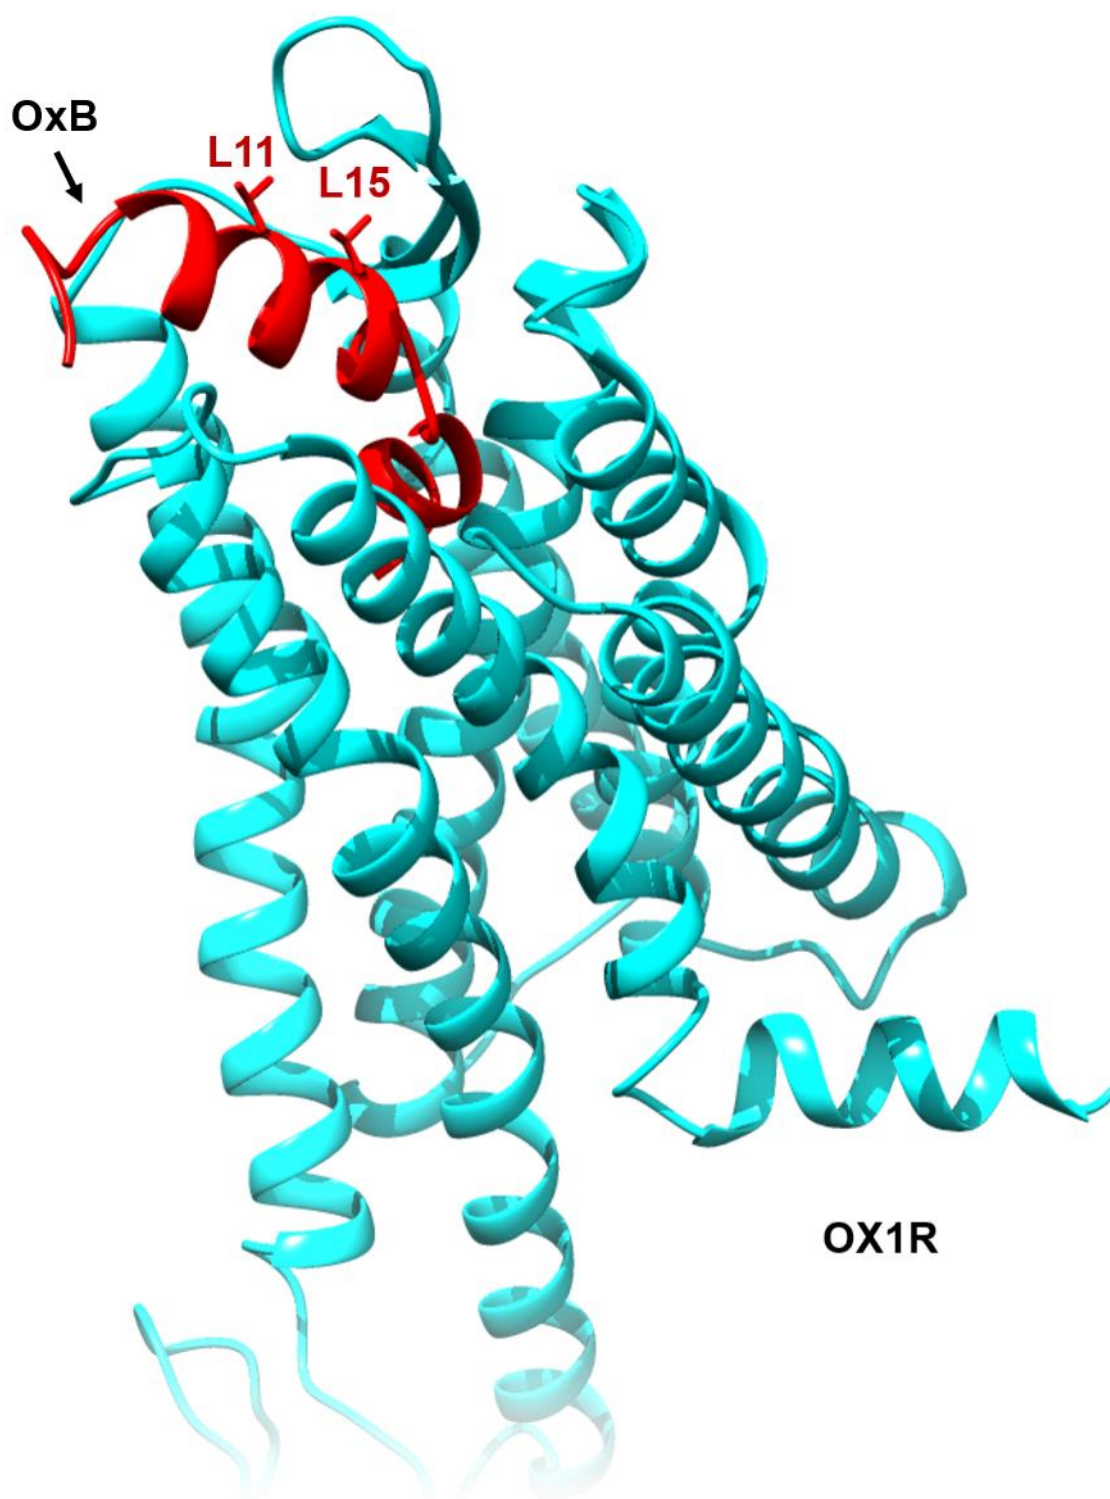

Figure S7

Supplement: BPH-172-5211-s009.pdf [file BPH-172-5211-s009.pdf]
